# Supplementary material for: Optimal positive end-expiratory pressure obtained with titration of a fraction of inspiratory oxygen: a randomized controlled clinical trial
Source: PubMed Central journal article supplement — Ann Transl Med. 2023 Mar 9;11(5):203. doi: 10.21037/atm-22-4357 (PMC10061449; doi:10.21037/atm-22-4357), 2023-03-09
Supplement: atm-11-05-203-dss.pdf [file atm-11-05-203-dss.pdf]

## Data Sharing Statement

|                     |                                                                                                                                                     |                                                                                                                                       |
|---------------------|-----------------------------------------------------------------------------------------------------------------------------------------------------|---------------------------------------------------------------------------------------------------------------------------------------|
| <b>Article Info</b> | <a href="https://dx.doi.org/10.21037/atm-22-4357">https://dx.doi.org/10.21037/atm-22-4357</a>                                                       |                                                                                                                                       |
| <b>Item</b>         | <b>Question</b>                                                                                                                                     | <b>Authors' Response<br/>(place "-" if not applicable)</b>                                                                            |
| 1                   | Would you like to share data collected for your study to others?                                                                                    | Yes.                                                                                                                                  |
| 2                   | If not, would you like to share the reason for your decision?                                                                                       | -                                                                                                                                     |
| 3                   | What data in particular will be shared?                                                                                                             | All the datasets analysed during the current study are available from the corresponding author on reasonable request.                 |
| 4                   | Any other documents will be shared? Such as study protocol, statistical analysis plan, informed consent form, clinical study report, analytic code. | Statistical analysis plan, informed consent form, and clinical study report will also be shared if requested.                         |
| 5                   | When will data availability begin?                                                                                                                  | From the publication date.                                                                                                            |
| 6                   | When will data availability end?                                                                                                                    | Five years within the publication date, since the technique may be updated over time.                                                 |
| 7                   | To whom will you share the data?                                                                                                                    | Anesthesiologists interested in perioperative lung protection strategies.                                                             |
| 8                   | For what type of analysis or purpose?                                                                                                               | To provide a simple and feasible method for the titration of PEEP.                                                                    |
| 9                   | How or where can the data/documents be obtained?                                                                                                    | Emails could be sent to the address below to obtain the shared data: <a href="mailto:snapzhang@aliyun.com">snapzhang@aliyun.com</a> . |
| 10                  | Any other restrictions?                                                                                                                             | We may balance the potential benefits and risks for each request and then provide the data that could be shared.                      |
